**Free-living marine nematodes diversity at Ponta Delgada-São Miguel (Azores archipelago, North-East Atlantic Ocean): first results from shallow soft-bottom habitats**

Alberto de Jesús Navarrete<sup>1\*</sup>, Víctor Aramayo<sup>2,3</sup>, Anitha Mary Davidson<sup>4</sup>, Ana Cristina Costa<sup>5</sup>

1 Systematic and Aquatic Ecology Department, El Colegio de la Frontera Sur, Unidad Chetumal,

México. Av. Centenario km 5.5, Chetumal Quintana Roo, México.

2 Facultad de Ciencias Biológicas, Universidad Nacional Mayor de San Marcos, P.O. BOX 1898, Lima 100, Peru.

3 Dirección de Oceanografía y Cambio Climático. Instituto del Mar del Perú, P.O. BOX 22, Callao, Peru.

4 School of Ocean Studies and Technology, Kerala University of Fisheries and Ocean Studies, Panangad PO Kochi 682506, Kerala India. Present address: CSIR-National Institute of Oceanography, Regional Centre, Kochi-682018, Kerala India.

5 Faculdade de Ciências e Tecnologia e CIBIO/InBio – Centro de Investigação em Biodiversidade e Recursos Genéticos, Universidade dos Açores

\* Corresponding author: [anavarre@ecosur.mx](mailto:anavarre@ecosur.mx)

## Abstract

Contrasting (sand, algae, rocky-dominated, mixed) benthic habitats were sampled to characterize marine nematode diversity inhabiting surface sediments in São Miguel (Azores, North-East Atlantic Ocean) in July 2019. Nematodes were extracted from the surface layer of sediments and morphologically identified using light microscopy. Nematode taxonomy was based on living/fresh specimens to ensure a suitable recognition of morphological traits. Our results provide a preliminary checklist of free-living marine nematode genera from 21 intertidal and sublittoral sandy beach sites along the coast of São Miguel island, Azores archipelago, Portugal. The nematode fauna was represented by 4 orders, 21 families, and 43 genera. *Cyatholaimus*, *Desmodora* and *Daptonema* had two morphospecies each. Enoplida was represented by 8 families and 13 genera, while Chromadorida by 7 families and 18 genera, the latter corresponding to the most diverse nematode group. Monhysterida had 5 families and 10 genera and Araeolaimida was represented by a single 1 family and 2 genera. The most common genera (i.e., accounting for 75% of all organisms) included *Adoncholaimus* (most abundant genus, 32 specimens), *Axonolaimus* (18), *Cyatholaimus* (17), *Enoploides* (13), *Rhabdocoma*, and *Acanthopharynx* (11). *Viscosia* and *Enoplolaimus* were represented by 7 specimens, whilst *Halalaimus*, *Desmoscolex*, *Monophostia*, *Daptonema*, and *Theristus* obtained only 6 each. The dominant nematode taxa of São Miguel island have been commonly previously reported in other coastal habitats including sandy beaches. They can be considered typical meiofaunal components of intertidal sandy beaches. Many of the nematode morphotypes found in São Miguel island could represent new species to science. As far as we know, this is the first report on free-living nematodes for São Miguel Island and for marine shallow water in the Azores. Our findings will serve as an import baseline for future research aiming to improve our understating of nematode communities in volcanic islands such as São Miguel in the Azores archipelago.

**Keywords: free-living marine nematodes, meiofauna, intertidal benthic habitats, volcanic sediments.**

## Resumo

Diversos habitats bentónicos (areia, algal, rochoso e misto) foram amostrados para caracterizar a diversidade de nematodes marinhos que habitam o sedimento superficial em São Miguel (Açores, Oceano Atlântico Nordeste) em Julho 2019. Os nematodes foram extraídos da camada superficial de sedimento e identificados morfológicamente usando microscopia óptica. A identificação taxonómica realizou-se com base na observação de espécimes vivos e/ou frescos para garantir o reconhecimento adequado dos caracteres morfológicos. Os resultados providenciam uma lista taxonómica preliminar dos nematodes marinhos de vida livre de 21 locais intertidais e subtidais de praias arenosas ao longo da costa da ilha de São Miguel, no arquipélago dos Açores, Portugal. A fauna de nematodes obtida encontrou-se representada por 4 ordens, 21 famílias e 43 géneros. Os géneros *Cyatholaimus*, *Desmodora* e *Daptonema* apresentaram 2 morfoespécies cada. A ordem Enoplida representou-se por 8 famílias e 13 géneros, Chromadorida por 7 famílias e 18 géneros, a última correspondendo ao grupo de nematodes mais diverso. Monhysterida apresentou 5 famílias e 10 géneros e Araeolaimida estava representada por uma única família e 2 géneros. O género mais comum (contribuindo para 75% de todos os organismos amostrados) incluiu *Adoncholaimus* (o género mais abundante, 32 espécimes), *Axonolaimus* (18), *Cyatholaimus* (17), *Enoploides* (13), *Rhabdocoma*, e *Acanthopharynx* (11). *Viscosia* e *Enoplolaimus* foram representados por 7 espécimes, enquanto que *Halalaimus*, *Desmoscolex*, *Monophostia*, *Daptonema*, e *Theristus* foram representados por apenas 6 indivíduos cada. Os *taxa* dominantes de nematodes marinhos na ilha de São Miguel têm sido comumente reportados para outros habitats costeiros incluindo praias arenosas. Podem ser considerados um componente típico da meiofauna de praias arenosas intertidais. Muitos dos morfotipos de nematodes marinhos encontrados na ilha de São Miguel podem representar novas espécies para a ciência. Tanto quanto sabemos, este é o primeiro registo de nematodes marinhos para a ilha de São Miguel e a primeira lista de nematodes marinhos de baixa profundidade para os Açores. Estes resultados servirão como uma baseline importante para futuras investigações com o objectivo de melhorar a nossa compreensão sobre as

comunidades de nematodes em ilhas vulcânicas como a ilha de São Miguel no arquipélago dos Açores.

**Palavras chave: nematodes marinhos de vida livre, meiofauna, habitats bentônicos intertidais, sedimentos vulcânicos.**

## **Introduction**

Shallow marine environments such as sandy beaches are among the most appreciated ecosystems by humankind not only for their recreational and economic value but also for the contribution of ecosystem services they provide like: sediment storage and transport, wave dissipation and habitat for benthic organisms (Short, 1996; McLachlan & Brown, 2006). The very condition of sandy beaches makes them look like lifeless habitats, in terms of macrofauna, however, these environments are home to a diverse and abundant interstitial fauna composed mainly by meiofauna; animals smaller than 500  $\mu\text{m}$  and larger than 35  $\mu\text{m}$  (McLachlan & Jaramillo 1995; Giere, 2009).

Free-living nematodes are one of the most abundant meiofaunal organisms in sedimentary environments (>80% of total community abundance), where they play a pivotal role in the recycling of organic matter and energy flow, thus acting as a link between the microfauna and the benthic macrofauna as well as higher trophic groups (e.g. fishes; Bhadury *et al.*, 2015). Nematodes are considered ubiquitous and are found in almost all environments (Heip *et al.*, 1985), where their spatial distribution and abundance levels are often shaped by several environmental factors. However, sediment type plays a fundamental role in nematode distribution. Previous studies have shown that some nematode families such as Desmodoridae, Microlaimidae, Camacolaimidae, and Ironidae are often dominant in sandy substrates, while in finer sediments such as silts or clays, Anoplостomidae, Comesomatidae, and Linhomoeidae are usually the dominant ones (Sharma & Webster, 1983; Goubault & Warwick, 1994; Nicholas &

Hodda 1999; Gheskiere *et al.*, 2004; Urban-Malinga *et al.*, 2004; Calles *et al.*, 2005; Hourston *et al.*, 2005; Moreno *et al.*, 2006; de Jesús-Navarrete, 2007; Mundo-Ocampo *et al.*, 2007; Bhadury *et al.*, 2015).

It is recognized that research on marine nematodes at European coastal habitats is well advanced with a better understanding of their spatio-temporal patterns, including taxonomic keys for marine nematodes from that region (Platt & Warwick, 1983; 1988; Warwick *et al.*, 1998; Lambshhead & Boucher, 2003). Numerous studies focused on nematode communities have been carried out in European sandy beaches (Vincx *et al.*, 1990; Nicholas & Hodda, 1999; Gheskiere *et al.*, 2004; Urban-Malinga *et al.*, 2004; Calles *et al.*, 2005; Semprucci *et al.*, 2013). Unfortunately, our understanding of nematode species distribution in tropical regions is still scarce (Bhadury *et al.*, 2015). Some papers have been published above marine nematodes of Canary Islands, (Riera *et al.* 2005; 2014), however, we have very little knowledge of nematode communities from remote volcanic islands such as the Azores archipelago. Nematode studies in this area have solely focused on deep-sea hydrothermal and seamount habitats (Zeppilli *et al.*, 2013; 2015; Bellec *et al.*, 2018), whereas no reports are available for nematode assemblages in shallow sandy habitats. Overall, nematodes have been a neglected group in local marine diversity studies, mainly due to lack of local taxonomic expertise. (see Costello *et al.*, 2006).

In order to contribute to the current knowledge of the diversity at the Azores Archipelago as well as to the diversity of sandy environments in volcanic islands, the present study aims to identify the free-living nematofauna inhabiting surface sediments from shallow soft-bottom habitats at São Miguel island.

## Materials and Methods

### Study area

Like the other islands in the Azores archipelago, São Miguel is a volcanic-originated island, characterized by unique flora and fauna (Borges *et al.*, 2020). Being the largest island in this region (Borges *et al.*, 2020) exhibits several shallow benthic habitats (e.g. open sandy beaches, intertidal pools, rocky shores). Although some inventorial efforts have been oriented to terrestrial and marine (large) fauna (e.g. mammals, seabirds), less is known about the local marine invertebrate fauna (in particular, the tiny, meiofauna-sized component).

Samples analyzed in the present study were collected during the International Workshop VW-Summer School held at the University of the Azores on July 15-24, 2019. This workshop was focused on the diversity of local meiofaunal groups.

### Sampling strategy

Sediment samples were obtained in 21 stations, distributed along with 8 localities including different benthic habitats (Figure 1, Table 1), the bathymetric range of our samples fluctuated from 0 to 18 m. Samples were collected by digging surface sandy sediments in selected intertidal habitats and/or using PVC corers (5 cm internal diameter) through free diving. Local physical characteristics of benthic habitats, including the presence of biological components (e.g. macroalgae), type of sediment (biogenic, mixed, etc.) were registered. The samples were stored *in situ* in plastic jars and buckets. No fixative chemicals were used, live specimens were employed in all cases to avoid critical changes in key morphological traits used in the taxonomical identification.

In the laboratory, meiofauna was extracted from the sediment by decantation, with some modifications in the procedure employed (see Pfannkuche & Thiel, 1988; Vincx, 1996). Meiofaunal organisms retained in a 35  $\mu\text{m}$  sieve were then used for morphological

characterization. Nematode specimens were manually separated from meiofauna bulk samples using a dissecting scope Nikon, mounted in glass slides with glycerin, and identified with a compound microscope (100X) Nikon Eclipse E1000, using pictorial keys (Platt & Warwick, 1983; 1988; Warwick *et al.*, 1998), and the Nemys database (Becerra *et al.*, 2019).

[Figure 1] / [Table 1]

## Results

The nematode fauna at São Miguel island was represented by 4 orders, 21 families, and 43 genera. Enoplida had 8 families and 13 genera, while Chromadorida was represented by showed 7 families and 18 genera, thus being the most diverse nematode order. Monhysterida had five families and 10 genera, whereas Araeolaimida was only represented by 1 family and 2 genera (Fig. 2).

[Figure 2]

A total of 226 specimens were identified to the genus level (Fig. 3). The most abundant genera, which altogether account for 75% of the nematode fauna, included *Adoncholaimus* (32 individuals), *Axonolaimus* (18), *Cyatholaimus* (17), *Enoploides* (13), *Rhabdocoma* and *Acanthopharynx* (both with 11). The genera *Viscosia* and *Enoplolaimus* were represented by 7 specimens, while *Halalaimus*, *Desmoscolex*, *Monophostia*, *Daptonema*, and *Theristus* only by 6 specimens (Fig. 4). Most likely, some of the specimens identified in this study represent undescribed nematode. *Cyatholaimus*, *Desmodora* and *Daptonema* had two morphospecies each one.

[Figure 3]

Sites with the highest nematode abundances included station 16 (40 specimens) and station 19 (36 specimens), followed by stations 15a and 15b, with 26 and 22 specimens, respectively. Station 7 had 13 organisms, while station 4 had 10 specimens. The rest of the stations revealed less than 10 organisms (Table 2).

[Table 2]

## Discussion

Shallow benthic habitats are part of marine ecosystems of high socioeconomic importance, and frequently vulnerable to human impacts. From an ecological aspect, people might see these areas (e.g. sandy beaches) as poorly diverse habitats, which somehow attracted very few ecological researches (Defeo and McLachlan 2005). This is unfortunate since many shallow marine areas harbour numerous species, especially those belonging to the benthic meiofauna, which are important links between micro-fauna and macrofauna, participating actively in benthic food webs (Weslawski et al., 2000).

This study reports for the first time a list of free-living marine nematodes living on shallow soft-bottom habitats for São Miguel island, hence for the Azores. Although our sampling effort was relatively low and therefore does not represent the entire nematode diversity of São Miguel island, we believe it is the first step in the right direction to understand the diversity of marine nematodes on the island and also gain insights of nematodes associated with remote volcanic islands. Despite we cannot directly compare the number of nematode morphospecies (43 genera and 21 families) recorded in São Miguel island with other sandy beaches around the world due to differences in sampling effort and beach morpho dynamic conditions, we observed that the nematode diversity of São Miguel island is similar (i.e., in the range) in terms of nematode composition, particularly some common Families, where between 30 and 179 species have been reported (Ott, 1972; Platt, 1977; Blome 1983; Nicholas, 2006; Maria *et al.*, 2013; Semprucci *et al.*, 2013; Bhadury *et al.*, 2015). In the Canary island, Riera *et al.*, (2014) reported 48 nematode species, with a dominance of *Daptonema hirsutum*, and *Pomponema sedecima*, other species present were *Acanthopharynx aff denticulate*, *Actarjania*, sp1 and *Ceramonema yunfengi* and *Scaptrella cf cincta*.



Our results are also similar to those reported by Maria *et al.* (2013) who found 54 genera belonging to 25 families in two sandy beaches of Brazil, higher than those reported by Bhadury *et al.* (2015) on the coasts of India (20 genera and 13 families), but lower than the diversity in Italy, where 55 genera and 21 families were reported, having Chromadoridae and Xyalidae as the most diverse families, with 9 and 7 genera, respectively (Semprucci *et al.*, 2013), and lower than the Gulf of California where 80 genera were found (Mundo-Ocampo *et al.*, 2007). Likewise, in a temperate sandy beach at the Belgian coast Gherskiere *et al.* (2004) found 65 nematode genera representing 26 families, where Xyalidae was the most diverse in the number of genera (11) and species (20).

For the sandy beaches of Italy, Semprucci *et al.* (2013) indicated that the most abundant families were Xyalidae (47%), Chromadoridae (14%), Axonolaimidae (9%), and Comesomatidae (8%). In our study, the dominant families were Oncholaimidae, Axonolaimidae, Cyatholaimidae, Thoracostomopsidae, and Desmodoridae, and closely resembles the findings of Maria *et al.* (2013) who found Chromadoridae, Cyatholaimidae, Desmodoridae, and Oncholaimidae as the dominant nematode families on sandy beaches in Brazil. In addition to these same nematode families, Bhadury *et al.* (20015) reported the presence of Oxystominidae, Chromadoridae and Sphaerolaimidae in India.

Even though our results are still preliminary, we can infer that the presence of some genera indicates environmental conditions. For example, in station 7 (the “Marina”) we found a typical nematode community of fine sediments, with a dominance of *Paracomesoma*, *Sabatieria* (both Comesomatidae), and *Daptonema* (Xyalidae). These nematode genera are considered indicators of high concentrations of organic matter (Semprucci *et al.*, 2015; Bhadury *et al.*, 2015). As the first checklist of marine nematodes for São Miguel Island, our study showed that nematode diversity (i.e., regarding the number of genera and families) is within the range found in other sandy beach habitats. Furthermore, our study found congruence concerning the dominant families often found in sandy beaches. Additional information related to the type and origin of sediments is needed to fully understand the distribution patterns of nematode communities in

São Miguel island. In fact, sediments in this remote island are predominantly of volcanic origin and are certainly an important environmental factor structuring nematode communities in this region. In Trindade, Brazil, Santos & Venekey (2017) found that nematode fauna was composed mainly of non-selective deposit feeders, with a total of 27 genera from 12 families, and Cyatholaimidae, Xyalidae and Oncholaimidae as the most abundant, the same families present in São Miguel. Therefore, we must consider it when making comparisons between nematode communities of sandy beaches. Nevertheless, we believe that this preliminary dataset on marine nematode communities will serve as a baseline for future taxonomic and ecological research in São Miguel as well as other volcanic islands.

Our results are also interesting because soft-sediment infauna (< 500  $\mu\text{m}$ ) in the Azores has been regarded as impoverished, particularly in shallow water sites (< 20 m in depth; e.g., Morton *et al.*, 1998; Bamber & Robbins, 2009). This low infauna diversity at the Azores has been related to sediment instability (Ávila *et al.*, 2008; Bamber & Robbins, 2009). Benthic soft-bottom habitats in the Azores are particularly devoid of macroinvertebrates, thus highlighting the importance of studying other infaunal taxa such as marine nematodes for environmental monitoring programs. Moreover, nematode communities could also be used as an indicator for Ecological Quality Status assessments in the scope of the water framework directive, similarly to what has been advocated for the Mediterranean (e.g., Moreno *et al.*, 2011; Semprucci *et al.*, 2015). Before it becomes a reality, however, additional work is needed to be put forward for a more comprehensive study (e.g., incorporating temporal variation) of marine nematode communities in the Azores archipelago.

### **Concluding remarks**

Our study shows the first results regarding the local diversity of free-living nematodes and provides scientific evidence about the diversity of small invertebrates (generally poorly studied or unconsidered in environmental studies). It also poses the need for increased efforts to

improve the taxonomic analysis of particularly adaptive and diverse groups such as meiofauna. Moreover, as observed in other similar study areas, there is a significant possibility to suspect that many local benthic species (including some species here reported) could be new for science and might be endemic and/or restricted to local oceanographic conditions. On the other hand, our results also show that even under a limited sampling effort, these benthic communities can exhibit high diversity, possibly suggesting an ability to successfully occupy different types of shallow benthic habitats and use of available resources. More efforts are needed to understand the ecological role and value of these species on highly dynamic, shallow environments, and their changes over time.

### **Acknowledgements**

AJN, VA, and AMD thank Dr Katharina Jörger, the VW Foundation, and DRCT M3.3.B/ORG.R.C./020/2019 (funding) for facilitating our participation in the Summer Meiofauna Workshop. Thanks to the meiofauna team for sorting nematode specimen and to the University of the Azores for allowing us to use laboratories and the logistical help provided.

**Authors' contribution statement:** AJN and VA identified nematode specimens and wrote the manuscript; AMD processed sediment samples; ACC helped with laboratory equipment and wrote the manuscript.

## References

ÁVILA, S.P., P. MADEIRA, C.M. DA SILVA, M. CACHAO, B LANDAU, R QUARTAU & A.D.F. MARTINS, 2008. Local disappearance of bivalves in the Azores during the last glaciation. *Journal of Quaternary Science: Published for the Quaternary Research Association*, 23(8), 777-785.

BAMBER, R.N. & R ROBBINS, 2009. The soft sediment infauna off São Miguel, Azores, and a comparison with other Azorean invertebrate habitats. *Açoreana S6*, 201-210.

BELLEÇ, L., M.A. CAMBON-BONAVITA, V. CUEFF-GAUCHARD, L. DURAND, N. GAYET & D. ZEPELLI, 2018. A nematode of the Mid-Atlantic Ridge Hydrothermal Vents Harbors a Possible Symbiotic Relationship. *Front. Microbiol.* 9:2246. doi: 10.3389/fmicb.2018.02

BEZERRA, T.N., W. DECRAEMER, U. EISENDLE-FLÖCKNER, M. HODDA, O. HOLOVACHOV, D. LEDUC, D. MILJUTIN, V. MOKIEVSKY, R. PEÑA SANTIAGO, J. SHARMA, N. SMOL, A. TCHESUNOV, V. VENEKEY, Z. ZHAO & A. VANREUSEL, 2019. Nemys: World Database of Nematodes. Accessed at <http://nemys.ugent.be> on 2020-01-17. doi:10.14284/366

BHADURY, P., N. MONDAL, K. GANI, M. THAMEEMUL ANSARI, P. PHILIP, R. PITALE, A. PRASADE, P. NAGALE & D APTE, 2015. Checklist of free-living marine nematodes from intertidal sites along the central west coast of India. *Check List* 11(2): 1605, doi: <http://dx.doi.org/10.15560/11.2.1605>.

BLOME, D., 1983. Okologie der nematoda eines sandstrandes der nord see in sel sylt. *Mikrof Meeresb* 88: 517-590.

BORGES P.A.V., A.M.C. SANTOS, R.B. ELIAS & G. ROSALINA, 2020. The Azores Archipelago: Biodiversity Erosion and Conservation Biogeography. In: GOLDSTEIN, M.I. & D.A. DELLA SALA (ed.), *Encyclopedia of the World's Biomes*, Elsevier, 101-113, ISBN 9780128160978

CALLES, A., M. VINCX, P. CORNEJO & J. CALDERÓN, 2005. Patterns of meiofauna (especially nematodes) in physical disturbed Ecuadorian sandy beaches. *Meiofauna Marina* 14: 121-129

GHESKIERE, T., E. HOSTE, J. VANAVERBEKE, M. VINCX & S. DEGRAER, 2004. Horizontal zonation patterns and feeding structure of marine nematode assemblages on a macrotidal, ultra-dissipative sandy beach De Panne, Belgium. *J Sea Res* 55: 221-226.

COSTELLO, M.J., P. BOUCHET, C.S. EMBLOW & A. LEGAKIS, 2006. European marine biodiversity inventory and taxonomic resources: state of the art and gaps in knowledge. *Marine Ecology Progress Series*, 316, 257-268.

DEFEO, O. & A. MCLACHLAN. 2005. Patterns, processes and regulatory mechanisms in sandy beach macrofauna: a multi-scale analysis. *Marine Ecology Progress Series* 295: 1-20.

DE JESUS-NAVARRETE, A., 2007. Littoral free-living nematode fauna off Socorro Island, Colima, Mexico. *Hidrobiologica* 17: 61-66.

HEIP, C., M. VINCX & G. VRANKEN, 1985. The ecology of marine nematodes. *Oceanography and Marine Biology* 23: 399-489.

HOURSTON, M., R.M. WARWICK, F.J. VALESINI & I.C. POTTER, 2005. To what extent are the characteristics of nematode assemblages in nearshore sediments on the west Australian coast related to habitat type, season and zone? *Estuar Coast Shelf Sci* 64: 601-612.

GIERE, O., 2009. Meiobenthology. the microscopic motile fauna of aquatic sediments, 2nd ed., Springer, Berlin Heidelberg, 527 p.

GHESKIERE T., E. HOSTE, L. KOTWICKI, S. DEGRAER, J. VANAVERBEKE & M. VINCX, 2002. The sandy beach meiofauna and free-living nematodes from De Panne (Belgium). Bull Inst R Sci Nat Belg 72: 43-49.

GOURBAULT, N. & R.M. WARWICK, 1994. Is the determination of meiobenthic diversity affected by the sampling method in sandy beaches? Mar Ecol 15: 267-279.

LAMBSHEAD, P.J.D. & G. BOUCHER G., 2003. Marine nematode deep-sea biodiversity – hyperdiverse or hype? Journal of Biogeography 30:475–485.

MARIA, T.F., P. PAIVA, A. VANREUSEL & A.M. ESTEVES, 2013. The relationship between sandy beach nematodes and environmental characteristics in two Brazilian sandy beaches (Guanabara Bay, Rio de Janeiro). Anais da Academia Brasileira de Ciências 85: 257–270. doi: 10.1590/S0001-37652013005000019.

MCLACHLAN, A. & E. JARAMILLO, 1995. Zonation on sandy beaches. Oceanography and Marine Biology, 33: 305-335.

MCLACHLAN, A. & A. BROWN, 2006. The ecology of sandy shores. Elsevier, USA, 373 p.

MIRTO, S., T. LA ROSA, C. GAMBI, R. DANOVARO & A. MAZZOLA, 2002. Nematode community response to fish-farm impact in the western Mediterranean. Environmental Pollution 116: 203–214. doi: 10.1016/S0269-7491(01)00140-3.

MORENO, M., T.J. FERRERO, V. GRENELLI, V. MARIN, G. ALBERTELLI & M. FABIANO, 2006. Across shore variability and trophodynamic features of meiofauna in a microtidal beach of the NW Mediterranean. Estuar Coast Shelf Sci 66: 357-367.

MORENO, M., F. SEMPRUCCI, L. VEZZULLI, M. BALSAMO, M. FABIANO & G. ALBERTELLI, 2011. The use of nematodes in assessing ecological quality status in the Mediterranean coastal ecosystems. *Ecological Indicators*, 11(2), 328-336.

MORTON, B., A.M. DE FRIAS MARTINS & J.C. BRITTON, 1998. *Coastal ecology of the Açores*. Sociedade Afonso Chaves.

MUNDO-OCAMPO, M., P.J.D. LAMBSHEAD, N. DEBENHAM, I.W. KING, P. DE LEY, J.G. BALDWIN, I. TANDINGAN DE LEY, A. ROCHA-OLIVARES, D. WAUMANN, W. K. THOMAS, M. PACKER & G. BOUCHER, 2007. Biodiversity of littoral nematodes from two sites in the Gulf of California. *Hydrobiologia* 586: 179-189.

NICHOLAS, W.L., 2006. The meiofauna of a new South Wales sandy beach: an introduction to the meiofauna of Australian ocean beaches. *Wetlands* 23: 14-31.

NICHOLAS, W.L. & M. HODDA, 1999. The free-living nematodes of a temperate, high energy, sandy beach, faunal composition and variation over space and time. *Hydrobiologia* 394: 113-127.

OTT, J.A., 1972. Determination of Fauna Boundaries of Nematodes in an Intertidal Sand Flat. *Int Rev Gesamten Hydrobiol* 57: 645-663.

RIERA, R., J. NUÑEZ, C.M. BRITO, 2014. Temporal variations of shallow subtidal meiofauna in los Cristianos Bay (Tenerife, Canary Islands, NE Atlantic Ocean. *Brazilian Journal of Oceanography*. 62(3):167-177, 2014

RIERA, R., J. NÚÑEZ, M.C. BRITO, 2005. New records of free-living marine nematodes from the Canary Islands (II). *Vieraea*. 33. 175-183.

PLATT, H.M., 1977. Vertical and horizontal distribution of free-living marine nematodes from Strangford Lough, Northern Ireland. *Cah Biol Mar* 18: 261-273.

PLATT, H.M. & R.M. WARWICK, 1983. Free-living marine nematodes. Part I: British Enoplids. Synopses of the British fauna (new series), 28. Cambridge: Cambridge University Press 307 pp.

PLATT, H.M. & R.M. WARWICK, 1988. Free-living marine nematodes. Part II. British Chromadorids. Leiden: Brill/Backhuys. 502 pp.

PFANNKUCHE, O. & H. THIEL, 1988. Sample processing. In: Higgins, R.P., Thiel, H. (Eds.), Introduction to the Study of Meiofauna. Smithsonian Institution Press, Washington, DC, pp. 134-145.

SANTOS, T.M. & V. VENEKEY, 2017. Meiofauna and free-living nematodes in volcanic sands of a remote South Atlantic, oceanic island (Trindade, Brazil). Journal of the Marine Biological Association of the United Kingdom: 1-16, doi:10.1017/S0025315417001710

SEMPRUCCI, F., F. FRONTALINI, A. COVAZZI-HARRIAGUE, R. COCCIONI, M. BALSAMO, 2013. Meio- and macrofauna in the marine area of the Monte St. Bartolo natural Park (Central Adriatic Sea, Italy). Sci. Mar. 77 (1), 189-199.

SEMPRUCCI, F., P. COLANTONI, C. SBROCCA, G. BALDELLI & M. BALSAMO, 2014. Spatial patterns of distribution of meiofaunal and nematode assemblages in the Huvadhoo lagoon (Maldives, Indian Ocean). Journal of the Marine Biological Association of the United Kingdom 94: 1377–1385. doi:10.1017/S002531541400068X

SEMPRUCCI, F., V. LOSI & M. MORENO, 2015. A review of Italian research on free-living marine nematodes and future perspectives on their use as Ecological Indicators (EcoInds). *Mediterranean Marine Science*, 16(2), 352-365. doi:<http://dx.doi.org/10.12681/mms.1072>

SHARMA, J. & J.M. WEBSTER, 1983. The abundance and distribution of free-living nematodes from two Canadian Pacific beaches. Estuar Coast Shelf Sci 16: 217-227



SHORT, A.D., 1996. Beach Classifications and Morphodynamics. *Revista Chilena de Historia Natural*, 69: 589-604.

URBAN-MALINGA, B., T. GHESKIERE, S. DEGRASER, S. DERYKE, K.W. OPALINSKY & T. MOENS, 2008. Gradients in biodiversity and macroalgal wrack decomposition rate across a macrotidal, ultradissipative sandy beach. *Mar Biol* 155: 79-90.

VINCX, M., P. MEIRE & C. HEIP, 1990. The distribution of nematodes communities in the Southern Bight of the North Sea. *Cahiers de Biologie Marine* 31(1): 107–129

VINCX, M., 1996. Meiofauna in marine and freshwater sediments. In: Hall, G.S. (Ed.), *Methods for the Examination of Organismal Diversity in Soil and Sediments*, pp. 187e195. Oxon, New York.

WARWICK, R.M., H.M. PLATT & P.J. SOMERFIELD, 1998. Free-living marine nematodes. Part III: British Monhysterids. *Synopses of the British fauna (new series)*, 53. Shrewsbury: Field Studies Council. 296 pp.

WESLAWSKI, J.M., B. URBAN-MALINGA, L. KOTWICKI, K. OPALINSKI, M. SZYMELFENIG, M. DUTKOWSKI, 2000. Sandy coastlines are there conflicts between recreation and natural values? *Oceanol. Stud.* 24, 5-18.

ZEPELLI, D., L. BONGIORNI, A. CATTANEO, R. DANOVARO, R.S. SANTOS, 2013. Meiofauna assemblages of the Condor Seamount (North-East Atlantic Ocean) and adjacent deep-sea sediments. *Deep Sea Res Part II* 98:87–100. doi: 10.1016/j.dsr2.2013.08.009

ZEPELLI, D., A. VANREUSEL, F. PRADILLON, S. FUCHS, P. MANDON, T. JAMES & J. SARRAZIN, 2015. Rapid colonization by nematodes on organic and inorganic substrata deployed at the deep-sea Lucky Strike hydrothermal vent field (Mid-Atlantic Ridge). *Mar. Biodivers.* 45, 489–504. doi: 10.1007/s12526-015-0348-2.

### Figure captions

Figure. 1. Location of sampling stations at São Miguel island, Azores archipelago, Portugal.

Figure. 2. Taxonomic composition of free-living marine nematodes (Order rank) at São Miguel island, Azores archipelago, Portugal.

Figure. 3. Abundance of free-living marine nematode taxa at São Miguel island, Azores archipelago, Portugal.

Figure. 4. Anterior region (i.e. mouthparts) of selected marine nematode specimens. These genera were considered the six most abundant nematodes in the shallow benthic habitats studied at São Miguel island, Azores archipelago, Portugal. a) *Adoncholaimus*, b) *Axonolaimus*, c) *Cyatholaimus*, d) *Enoploides*, e) *Rhabdocoma*, and f) *Acanthoparynx*. Scale bars: 50  $\mu$ m.

### Table captions

Table 1. Main information of localities studied, habitats, sampling methods and the number of stations employed during the study.

Table 2. Preliminary list of free-living marine nematodes from shallow benthic habitats at Isla São Miguel, Azores.

| Localities                                          | Station (Depth, m) | Sampling method         | Habitat             | Substrate                   |
|-----------------------------------------------------|--------------------|-------------------------|---------------------|-----------------------------|
| Praia do Fogo<br>(37°,730505 N - 25°,311092 E)      | 1 (4)              | hand-held benthic corer | Protected beach     | Sandy                       |
|                                                     | 2 (5)              |                         |                     | Sandy                       |
|                                                     | 3 (0)              |                         |                     | Sandy                       |
| Praia dos Moinhos<br>(37°,824582 N - 25°,447128 E)  | 4 (0.3)            | hand-held benthic corer | Open beach          | Sandy                       |
|                                                     | 5 (5)              |                         |                     | rocky bottom, fine sand     |
|                                                     | 6 (4)              |                         |                     | Mixed (algae)/sandy         |
| Marina<br>(37°,740842 N - 25°,658395 E)             | 7 (7)              | sediment grab           | Semiprotected beach | Sandy                       |
|                                                     | 8 (0)              |                         |                     | Sandy                       |
|                                                     | 9a (2.5)           |                         |                     | Sandy                       |
| Praia das Milicias<br>(37°,750533 N - 25°,623398 E) | 9b (2.5)           | hand-held benthic corer | Open beach          | Sandy                       |
|                                                     | 10 (0)             |                         |                     | Sandy                       |
|                                                     | 11 (0.5)           |                         |                     | Sandy                       |
|                                                     | 19 (18)            |                         |                     | Sandy, rocky bottom         |
|                                                     | 20 (18)            |                         |                     | Sandy, rocky bottom         |
|                                                     | 22 (0)             |                         |                     | Sandy                       |
|                                                     | 23 (1)             |                         |                     | Sandy                       |
| 24 (0)                                              | Sandy              |                         |                     |                             |
| Sao Roque<br>(37°,740017 N - 25°,638377 E)          | 12 (3)             | hand-held benthic corer | Semiprotected beach | Sandy                       |
|                                                     | 13 (1)             |                         |                     | Sandy                       |
|                                                     | 21 (0)             |                         |                     | Sandy, rocky bottom         |
|                                                     | 14 (3.5)           |                         |                     | Sandy                       |
| Piscinas Lagoa<br>(37°,740017 N - 25°,57495 E)      | 15a (17.7)         | hand-held benthic corer | Semiprotected beach | Sandy, rocky bottom         |
|                                                     | 15b (17.7)         |                         |                     | Sandy, rocky bottom         |
|                                                     | 15c (17.7)         |                         |                     | Sandy, rocky bottom         |
|                                                     | 16a (18)           |                         |                     | Sandy, rocky bottom         |
|                                                     | 17 (17)            |                         |                     | Sandy, rocky bottom         |
| Porto do Mosteiros<br>(37°,893701 N - 25°,817803 E) | 25 (1)             | hand-held benthic corer | Open beach          | Rocky (pool), gravel        |
|                                                     | 26a (2)            |                         |                     | Rocky shore, gravel         |
|                                                     | 27a (0.2)          |                         |                     | Rocky shore, gravel         |
| Lombo Gordo<br>(37°,786883 N - 25°,14234 E)         | 31 (0)             | hand-held benthic corer | Semiprotected beach | Sandy, rocky bottom, gravel |

Table 1.



Table 2.

| Taxon                   | Stations |           |          |          |           |          |          |          |          |          |           |           |          |           |          |           |          |          |          |          | Total    |            |
|-------------------------|----------|-----------|----------|----------|-----------|----------|----------|----------|----------|----------|-----------|-----------|----------|-----------|----------|-----------|----------|----------|----------|----------|----------|------------|
|                         | 3        | 4         | 5        | 6        | 7         | 8        | 9a       | 11       | 12       | 13       | 15a       | 15b       | 15c      | 16        | 17       | 19        | 20       | 21       | 23       | 26a      |          | 27a        |
| <i>Anticoma</i>         |          |           |          |          |           |          |          |          | 3        |          |           |           |          |           |          |           |          |          |          |          |          | 3          |
| <i>Cephalanticoma</i>   |          |           |          |          |           |          |          |          |          | 1        | 2         |           |          | 2         |          |           |          |          |          |          |          | 5          |
| <i>Odontanticoma</i>    |          |           |          |          |           |          |          |          |          |          |           |           |          |           |          | 5         |          |          |          |          |          | 5          |
| <i>Eurystomina</i>      |          |           |          |          |           |          |          |          |          |          |           |           |          | 1         |          |           |          |          |          |          |          | 1          |
| <i>Symplocostoma</i>    |          |           |          |          |           |          |          |          |          |          | 1         |           |          | 1         |          |           |          |          |          |          |          | 2          |
| <i>Thalassironus</i>    |          |           |          |          |           |          |          |          |          |          | 1         |           |          |           |          | 1         | 1        |          |          |          |          | 3          |
| <i>Adoncholaimus</i>    |          |           | 6        | 4        |           |          |          |          | 1        | 3        | 7         |           | 3        | 8         |          |           |          |          |          |          |          | 32         |
| <i>Viscosia</i>         |          |           |          |          |           |          |          | 2        |          |          | 3         |           |          | 1         |          |           | 1        |          |          |          |          | 7          |
| <i>Halalaimus</i>       |          |           |          |          |           |          |          |          |          |          |           | 6         |          |           |          |           |          |          |          |          |          | 6          |
| <i>Rhabdodemia</i>      |          |           |          |          |           |          |          |          |          |          |           | 2         | 1        | 1         |          | 1         |          |          |          |          |          | 5          |
| <i>Enoploides</i>       |          |           |          |          |           |          |          |          |          |          | 1         |           |          | 5         |          | 2         |          |          | 4        |          | 1        | 13         |
| <i>Enoplolaimus</i>     |          |           |          | 4        |           |          |          |          | 1        |          |           |           |          |           |          |           |          |          | 2        |          |          | 7          |
| <i>Rhabdocoma</i>       |          |           |          |          |           |          |          |          | 1        | 1        | 5         |           | 2        |           |          |           |          |          | 2        |          |          | 11         |
| <i>Ascolaimus</i>       | 1        |           |          |          |           |          |          |          |          |          |           |           |          |           |          |           |          |          |          |          |          | 1          |
| <i>Axonolaimus</i>      |          |           |          |          |           |          |          |          |          |          | 4         | 1         |          | 6         |          | 8         |          |          |          |          |          | 18         |
| <i>Odontophora</i>      |          |           |          |          |           |          |          |          |          |          |           |           |          | 3         |          | 5         |          |          |          |          |          | 8          |
| <i>Actinonema</i>       |          |           |          |          |           |          |          |          |          |          |           | 2         |          |           |          |           |          |          |          |          | 1        | 3          |
| <i>Chromaspirinia</i>   |          | 3         |          |          |           |          |          |          |          |          |           |           |          |           |          |           |          |          |          |          |          | 3          |
| <i>Graphonema</i>       |          |           |          |          |           |          |          |          |          |          | 1         |           |          |           |          |           |          |          |          |          |          | 1          |
| <i>Parachromadorita</i> |          | 2         |          |          |           |          |          |          |          |          |           |           |          |           |          |           |          |          |          |          |          | 2          |
| <i>Cyatholaimus sp1</i> |          | 5         |          |          |           | 3        |          |          |          |          |           |           |          | 2         |          |           | 5        |          |          |          | 2        | 17         |
| <i>Cyatholaimus sp2</i> |          |           |          |          |           |          |          |          | 1        |          |           |           |          | 1         |          |           | 1        |          |          |          |          | 3          |
| <i>Paracyatholaimus</i> |          |           |          |          |           |          |          |          |          |          |           |           |          | 1         |          |           |          |          |          |          |          | 1          |
| <i>Desmoscolex</i>      |          |           |          |          |           |          |          |          |          |          | 1         |           |          |           |          |           |          |          |          | 5        |          | 6          |
| <i>Tricoma</i>          |          |           |          |          |           |          |          |          |          |          |           | 2         |          |           |          |           |          |          |          |          |          | 2          |
| <i>Acanthopharinx</i>   |          |           |          |          |           |          |          |          |          |          | 3         | 2         | 1        | 1         |          | 3         | 1        |          |          |          |          | 11         |
| <i>Desmodora sp1</i>    |          |           | 2        |          |           |          |          |          |          |          |           |           |          |           |          | 2         |          |          |          |          |          | 4          |
| <i>Desmodora sp2</i>    |          |           |          |          |           |          |          |          |          |          |           |           |          | 1         |          |           |          |          | 1        |          |          | 2          |
| <i>Eubostrichus</i>     |          |           |          |          |           |          |          |          |          |          |           |           |          |           |          | 1         |          |          |          |          |          | 1          |
| <i>Paradesmodora</i>    |          |           |          |          |           |          |          |          |          |          |           |           |          | 1         |          |           |          |          |          |          |          | 1          |
| <i>Spirinia</i>         |          |           |          |          |           |          |          |          |          |          |           |           |          |           |          | 2         |          |          |          |          |          | 2          |
| <i>Monophostia</i>      |          |           |          |          |           |          |          |          | 1        | 1        |           |           |          | 2         |          |           |          | 2        |          |          |          | 6          |
| <i>Gammanema</i>        |          |           |          |          |           |          |          |          |          |          |           |           |          | 1         |          |           |          |          |          |          |          | 1          |
| <i>Paracomesoma</i>     |          |           |          |          | 3         |          |          |          |          |          |           |           |          |           |          |           |          |          |          |          |          | 3          |
| <i>Sabatieria</i>       |          |           |          |          | 4         |          |          |          |          |          |           |           |          |           |          |           |          |          |          |          |          | 4          |
| <i>Paramonohystera</i>  |          |           |          |          |           |          |          |          |          |          |           |           |          |           | 3        |           |          |          |          |          |          | 3          |
| <i>Promonohystera</i>   |          |           |          |          |           |          |          |          |          |          | 1         |           |          |           |          |           |          |          |          |          |          | 1          |
| <i>Linhomoeidae</i>     |          |           |          |          | 2         |          |          |          |          |          |           |           |          |           |          |           |          |          |          |          |          | 2          |
| <i>Sphaerolaimus</i>    |          |           |          |          | 2         |          |          |          |          |          |           |           |          |           |          |           |          |          |          |          |          | 2          |
| <i>Daptonema sp1</i>    |          |           |          |          | 2         | 2        |          |          |          |          |           | 1         |          |           |          |           | 1        |          |          |          |          | 6          |
| <i>Daptonema sp2</i>    |          |           |          |          |           |          |          |          |          |          | 1         | 1         | 1        |           |          |           |          |          |          |          |          | 3          |
| <i>Steineria</i>        |          |           | 1        |          |           |          |          |          |          |          |           |           |          |           |          |           |          |          |          |          |          | 1          |
| <i>Theristus</i>        |          |           |          |          |           |          |          |          |          |          |           |           |          |           |          | 6         |          |          |          |          |          | 6          |
| Unidentified            |          |           |          |          |           |          |          | 1        |          |          |           |           |          |           |          |           |          |          |          |          |          | 1          |
| <b>Total</b>            | <b>1</b> | <b>10</b> | <b>9</b> | <b>8</b> | <b>13</b> | <b>3</b> | <b>2</b> | <b>3</b> | <b>8</b> | <b>4</b> | <b>26</b> | <b>22</b> | <b>6</b> | <b>40</b> | <b>3</b> | <b>36</b> | <b>4</b> | <b>8</b> | <b>9</b> | <b>5</b> | <b>4</b> | <b>226</b> |

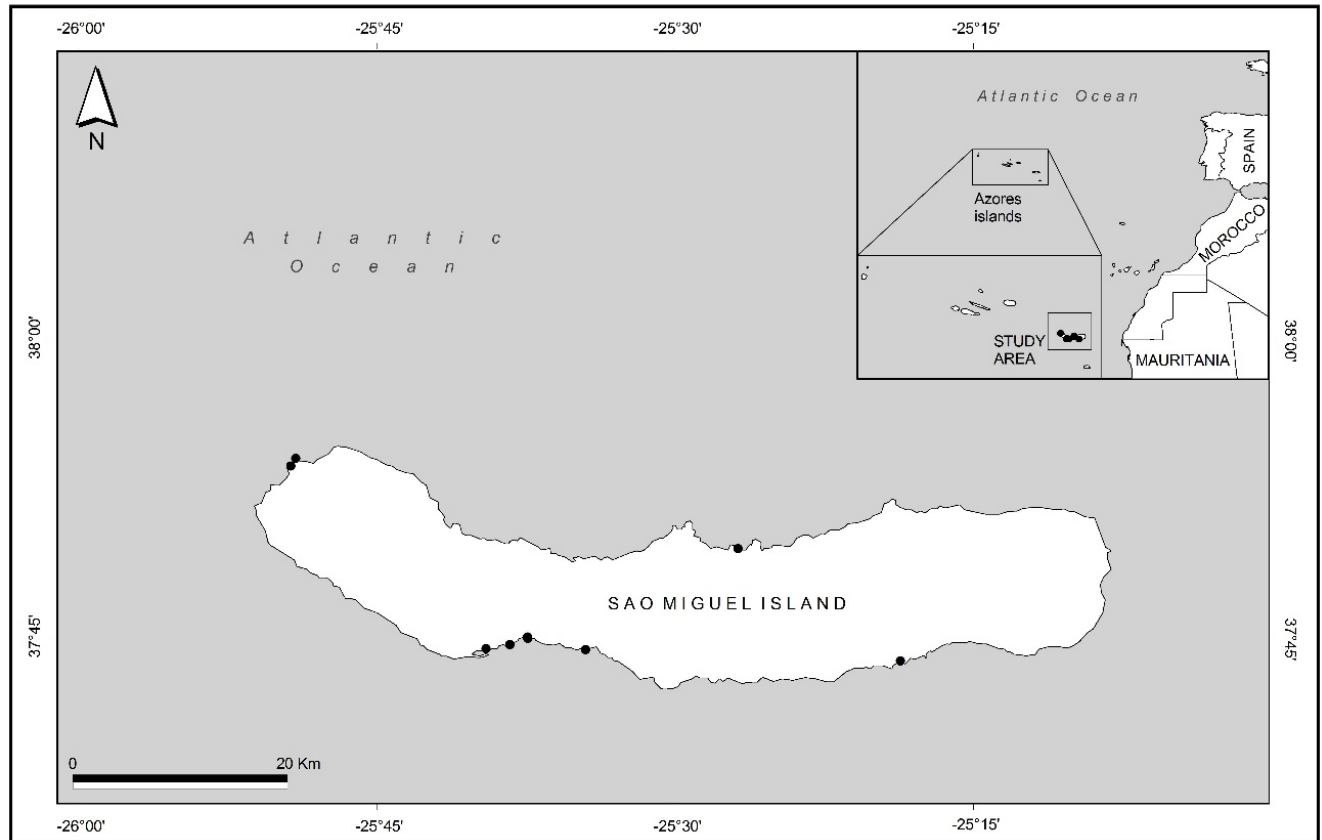

Figure. 1

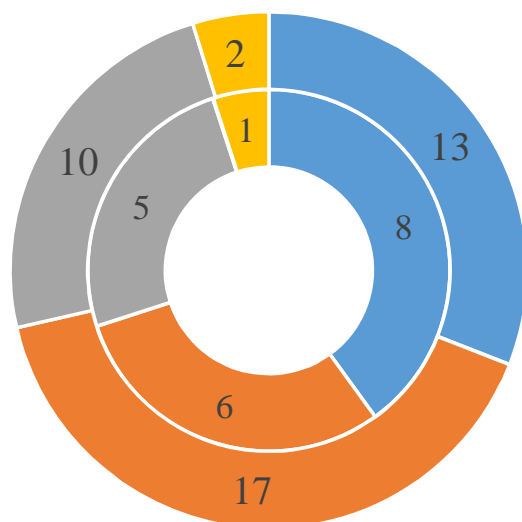

■ Enoplida ■ Chromadorida ■ Monhysterida ■ Araeolaimida

Figure. 2

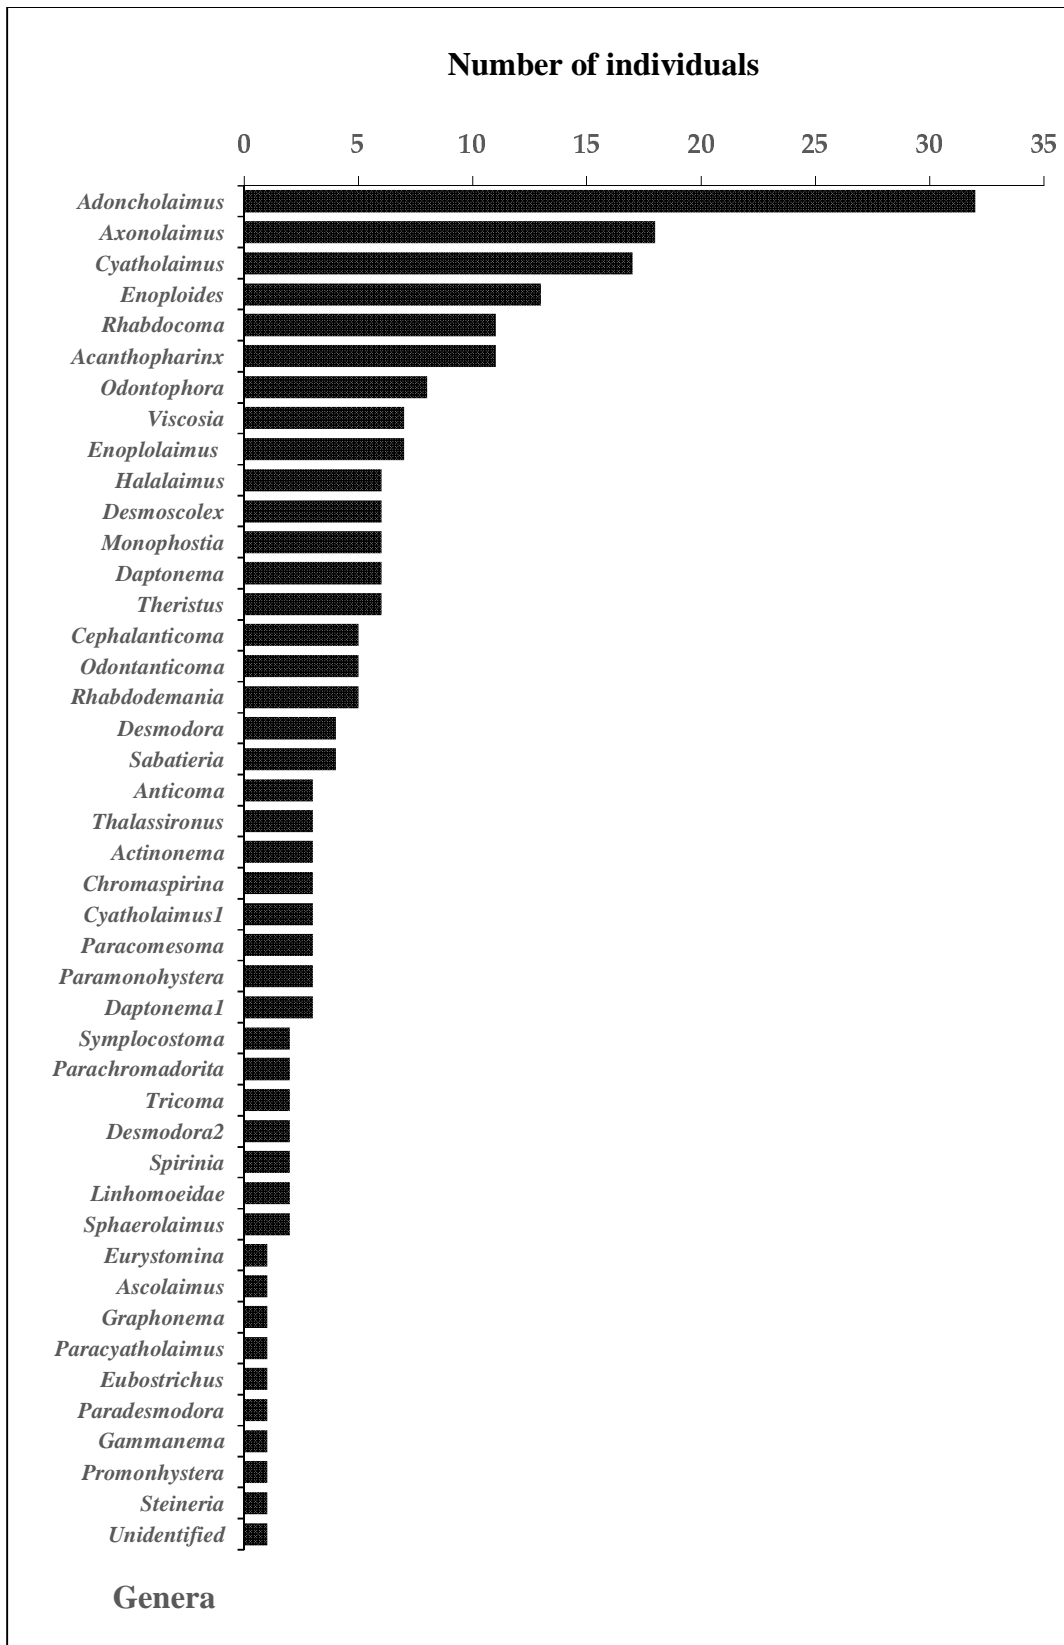

Fig.3



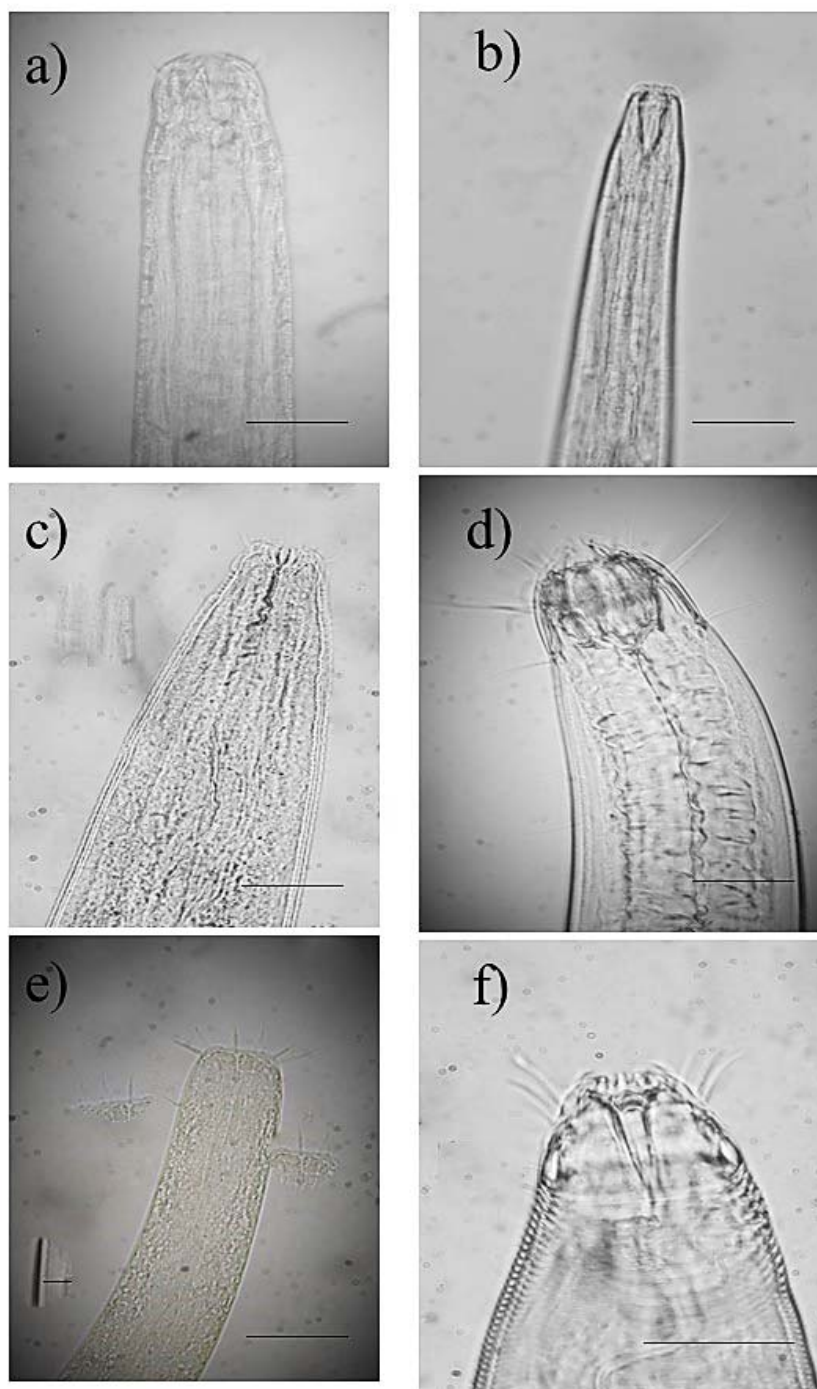

Figure. 4
